# Supplementary material for: Impaired learning and memory in CD38 null mutant mice
Source: PubMed Central journal article supplement (PMC4746819; doi:10.1186/s13041-016-0195-5), 2016-02-09
Supplement: 13041_2016_195_MOESM1_ESM.pdf [file 13041_2016_195_MOESM1_ESM.pdf]

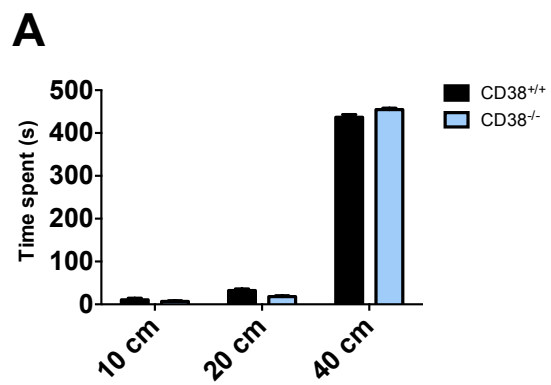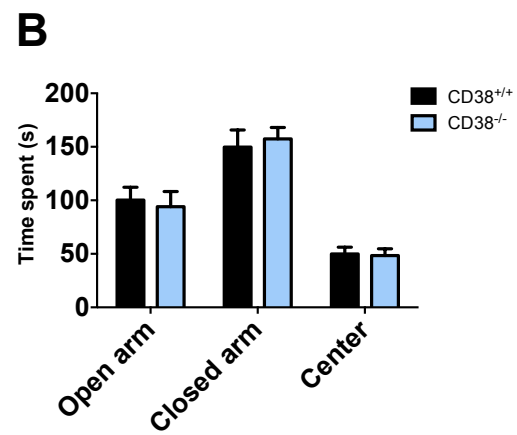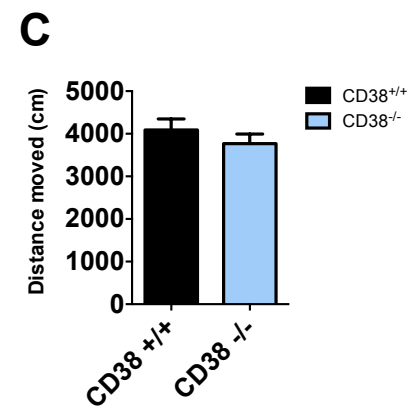

Supplementary Figure 1

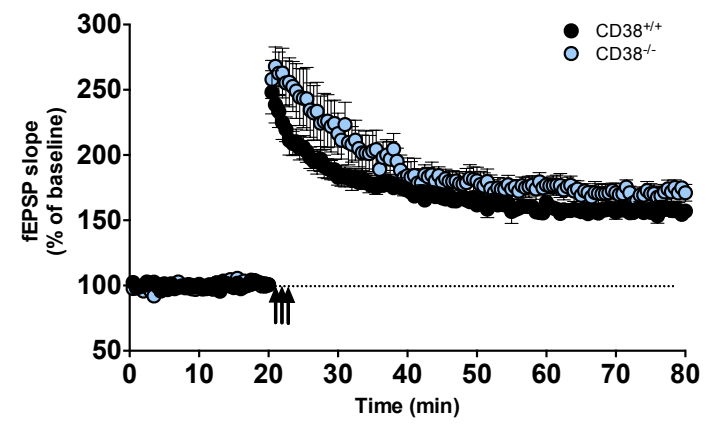

Supplementary figure 2
